1           **EssC is a specificity determinant for *Staphylococcus***  
2                                   ***aureus* type VII secretion**

3  
4                           Franziska Jäger, Holger Kneuper and Tracy Palmer\*

5  
6  
7   Division of Molecular Microbiology School of Life Sciences, University of Dundee, Dundee,  
8   UK.

9   \*To whom correspondence should be addressed.

10   Tel +44 1382 386464

11   e-mail [t.palmer@dundee.ac.uk](mailto:t.palmer@dundee.ac.uk)

12   Running title: EssC determines type VII substrate specificity

13

14

15 **ABSTRACT**

16 The Type VII protein secretion system (T7SS) is found in actinobacteria and firmicutes, and  
17 plays important roles in virulence and interbacterial competition. A membrane-bound ATPase  
18 protein, EssC in *Staphylococcus aureus*, lies at the heart of the secretion machinery. The  
19 EssC protein from *S. aureus* strains can be grouped into four variants (EssC1-EssC4) that  
20 display sequence variability in the C-terminal region. Here we show that the EssC2, EssC3  
21 and EssC4 variants can be produced in a strain deleted for *essC1* and that they are able to  
22 mediate secretion of EsxA, an essential component of the secretion apparatus. They are,  
23 however, unable to support secretion of the substrate protein EsxC, which is encoded only in  
24 *essC1*-specific strains. This finding indicates that EssC is a specificity determinant for T7  
25 protein secretion. Our results support a model where the C-terminal domain of EssC interacts  
26 with substrate proteins whereas EsxA interacts elsewhere.

27

28

29 **Keywords** *Staphylococcus aureus*. Protein secretion. Type VII secretion. Substrate  
30 recognition.

31

32 The type VII secretion system (T7SS) is found primarily in bacteria of the actinobacteria and  
33 firmicutes phyla and secretes proteins that lack cleavable N-terminal signal peptides. The  
34 system is best characterised in mycobacteria, where it is designated ESX, and pathogenic  
35 members of the genus can encode up to five copies of the secretion machinery (1, 2).  
36 Substrates of the T7SS may vary in size but are usually  $\alpha$ -helical in nature. Every T7SS  
37 analysed to date secretes at least one protein of the WXG100 superfamily. Proteins of this  
38 family are small helical hairpins that have a conserved W-X-G amino acid motif in a short loop  
39 between the two helices (3, 4). A YxxxD/E motif, located at the C-termini of some WXG100  
40 proteins acts, in concert with the WXG motif, as a bi-partite targeting sequence for T7 secretion  
41 (5-8). WXG100 proteins are secreted as folded dimers; in actinobacteria these are  
42 heterodimers of paired WXG100 proteins whereas in firmicutes these may also be  
43 homodimers (8). The T7SS also secretes much larger substrates that share a similar four-  
44 helical bundle arrangement of the WXG100 protein dimers (7, 9, 10). Some T7 substrates  
45 interact with chaperones prior to secretion and there is evidence that secretion of LXG domain  
46 substrates in firmicutes is dependent on complex formation with a WXG100 protein partner  
47 (11-13).

48 There are commonalities and differences between the T7SS of actinobacteria and firmicutes  
49 (14). A membrane-embedded ATPase of the FtsK/SpolIII family termed EccC/EssC is found  
50 in all T7SSs. In both systems the protein shares a similar overall topology, with two  
51 transmembrane domains that are usually followed by three P-loop ATPase domains at the C-  
52 terminus. Although all three P-loop ATPase domains are capable of binding ATP, mutagenesis  
53 studies have indicated that only ATP hydrolysis by domain 1 is essential for T7 secretion (15,  
54 16). In actinobacteria, a hexameric arrangement of the EccC ATPase lies at the centre of a  
55 1.8MDa complex that also contains six copies of the EccB, EssD and EccE proteins (17). In  
56 firmicutes, homologues of EccB, D and E are absent and a distinct set of membrane proteins,  
57 EsaA, EssA and EssB, work alongside the ATPase, EssC, to mediate T7 secretion (18-22). In

58 *Staphylococcus aureus* and *Bacillus subtilis* a secreted WXG protein, EsxA, and a small  
59 cytoplasmic protein, EsaB, are also required for T7SS activity (18, 19, 21-23) (Fig 1A).

60 The EccC/EssC ATPase has previously been implicated in substrate recognition. Crosslinking  
61 and co-purification experiments have identified complexes of *S. aureus* EssC with substrates  
62 EsaD (also called EssD) and EsxC (12, 24), and the EccC ATPase domains have been co-  
63 crystallised with a peptide from the C-terminus of the WXG protein, EsxB (16). Further  
64 evidence in support of a role for EssC in substrate recognition comes from genomic analysis  
65 of *S. aureus* (25). It was noted that there was sequence variability at the *ess* locus across  
66 different *S. aureus* strains. Genes coding for the core components EsxA-EssB are highly  
67 conserved (Fig 1B), as is the 5' end of *essC*, but the 3' portion of the gene falls into one of four  
68 sequence groupings (25). The *essC* sequence type strictly co-varies with the sequence of  
69 adjacent 3' genes, some of which are known or strongly predicted to encode secreted  
70 substrates. This would be consistent with the C-terminal variable region of EssC playing a role  
71 in substrate recognition. In this study we have addressed this hypothesis directly by assessing  
72 whether EssC proteins from the EssC2, EssC3 and EssC4 classes can support the secretion  
73 of the EssC1 substrate, EsxC (26) and of the core component, EsxA.

74 *S. aureus* EssC proteins are approximately 1480 amino acids in length and have a common  
75 domain organisation, with two forkhead associated (FHA) domains at their N-termini, two  
76 transmembrane domains and three repeats of a P-loop ATPase domain at their C-termini (27,  
77 28; Fig 1A). Sequence analysis indicates that *S. aureus* EssC proteins are almost sequence  
78 invariant until part way through the second ATPase domain, where the EssC1 variant, found  
79 in strains such as RN6390, Newman and USA300 starts to diverge (Fig 1C; Fig S1). The  
80 EssC2, EssC3 and EssC4 variants are more similar to one another, and share almost identical  
81 sequence until ATPase domain 3 where they also start to vary (Fig 1C; Fig S1). Of the four  
82 ATPases, variants 2 (from strain ST398) and 3 (from strain MRSA252) are the most similar  
83 (Fig S1).

84 We have previously constructed an in-frame deletion of *essC* in strain RN6390 and shown  
85 that this results in the inability to export both the core machinery component, EsxA, and the  
86 substrates EsxC and EsaD (12, 19). This secretion deficiency could be rectified by re-  
87 introduction of EssC1 encoded on plasmid pRMC2 (29). Fig 2A shows that production of  
88 EssC1 could be also restored when it was encoded on the expression vector pRAB11 (30),  
89 and that re-introduction of plasmid-encoded EssC1 resulted in strong secretion of both EsxA  
90 and EsxC in the RN6390  $\Delta$ *essC* strain.

91 Next, we amplified the genes for *essC2* (from strain ST398), *essC3* (from strain MRSA252)  
92 and *ess4* (from strain EMRSA15) and also cloned these into pRAB11 (see Table S1 for  
93 oligonucleotides used for these experiments). We first confirmed that the three variant EssC  
94 proteins could be stably produced in the RN6390  $\Delta$ *essC* strain background. To this end  
95 anhydrotetracycline (ATC) was added to induce plasmid-encoded production of EssC and  
96 whole cell samples were analysed by blotting with an EssC antiserum. It should be noted that  
97 the antiserum used was raised against a truncated protein covering the last two ATPase  
98 domains of the EssC1 variant (19). As shown in Fig 2A, each of the EssC2, EssC3 and EssC4  
99 variants could be recognised by this antibody, but not so strongly as the cognate EssC1 due  
100 to a lack of conservation of epitopes in this region of the protein. We conclude that all EssC  
101 variants can be produced in strain RN6390.

102 Next, we asked whether the variant EssC proteins in RN6390 could support T7 protein  
103 secretion. Fig 2B (top panel) shows that secretion of the EsxA core component was indeed  
104 supported by each of these EssC proteins, indicating that each EssC variant was functional in  
105 the heterologous strain background. However, none of the EssC variants were able to support  
106 secretion of the substrate protein, EsxC. Taken together these results confirm that EssC is a  
107 specificity determinant for substrate secretion by the *S. aureus* T7SS. The findings strongly  
108 suggest that the sequence invariant regions of EssC proteins are involved in mediating  
109 interactions with the conserved T7 core components, including the secreted protein EsxA  
110 (which has >99% sequence identity across all sequenced *S. aureus* strains) and that the

111 sequence variable region, primarily ATPase domain 3, is involved in substrate recognition.  
112 This might imply that EsxA and EsxC are secreted by different mechanisms.

113 Finally, it is interesting to note that secretion of all known substrates mediated by the EssC1  
114 variant is dependent on a chaperone protein, EsaE/EssE (12, 24). Some substrates of the  
115 actinobacterial T7SS also interact with specific chaperones of the EspG family to ensure  
116 delivery to the cognate secretion machinery (11, 31), although other substrates appear to be  
117 exported independently of a specific chaperone (2). No protein with any detectable sequence  
118 homology to either EsaE or EspG is encoded at the *ess* loci of the *essC2*, *essC3* or *essC4*  
119 strain variants. In future it will be interesting to determine whether the mechanism of substrate  
120 targeting differs across the Ess subtypes in *S. aureus*.

121

## 122 **ACKNOWLEDGEMENTS**

123 Dr Jon Cherry is thanked for his help with generating the structural model in Fig 1C. This study  
124 was supported by the Wellcome Trust (through Investigator Award 10183/Z/15/Z to TP, the  
125 Biotechnology and Biological Sciences Research Council (through the EASTBIO Doctoral  
126 Training Partnership award number BB/J01446X/1 which provided a PhD studentship (to FJ),  
127 and through grant BB/H007571/1) and by Medical Research Council (through grant  
128 MR/M011224/1). The authors declare no conflicts of interest.

129 **FIGURE LEGENDS**

130 **Figure 1. Sequence variability in *S. aureus* EssC.** A. The *S. aureus* T7 secretion machinery.  
131 Components that are essential for T7 secretion are shown in light grey with their subcellular  
132 locations. The hatched domains of EssC indicate sequence-variable regions. The substrate  
133 protein EsxC, found only in strains with the EssC1 variant, is shown in blue. B. Genetic  
134 organisation of the *S. aureus* *ess* locus in the four different *ess* strain variants. Since the 3'  
135 boundaries of the *ess* loci are not known, the first eight genes downstream of *essC* are shown  
136 in each case. The dotted line indicates the approximate position of *essC* sequence divergence  
137 and the shading at the 3' end of *essC* represents the region of sequence variability. C.  
138 Structural model of the ATPase domains of *S. aureus* EssC (generated using amino acids  
139 601-1078 of EMRSA15 EssC) using Phyre2 ([www.sbg.bio.ic.ac.uk/~phyre/](http://www.sbg.bio.ic.ac.uk/~phyre/)) with the structure  
140 of EccC from *Thermomonospora curvata* (16) as a template. The shading is dark blue:  
141 residues 601-1078, very highly conserved; light blue: residues 1079-1289 (where the EssC1  
142 sequence diverges from the remaining EssC); cyan: residues 1290-1479 (variable C-terminal  
143 region).

144

145 **Figure 2. Non-cognate EssC variants support secretion of EsxA but not EsxC.** A and B.  
146 Strain RN6390 or the isogenic *essC* deletion strain carrying pRAB11 (empty) or pRAB11  
147 encoding the indicated *essC* variant was subcultured into TSB medium supplemented with 1  
148  $\mu$ M hemin (32) and either 25ng/ml (RN6390  $\Delta$ *essC*/pEssC<sub>RN6390</sub>) or 100ng/ml (RN6390  
149  $\Delta$ *essC*/pEssC<sub>MRSA252</sub>/pEssC<sub>ST398</sub>/pEssC<sub>EMRSA15</sub>) anhydrotetracycline (ATC), to induce plasmid-  
150 encoded gene expression. Strain were grown aerobically until an OD<sub>600</sub> of 2 was reached after  
151 which A. 10  $\mu$ l of OD<sub>600</sub> 1 adjusted cells were separated on an 8% bis-Tris acrylamide gel and  
152 analysed by western blotting using anti-EssC antisera (19), or B. cultures were separated into  
153 supernatant and whole cell fractions and equivalent of 200  $\mu$ l of culture supernatant (sn) and  
154 10  $\mu$ l of resuspended cell sample (c) adjusted to an OD<sub>600</sub> = 1 were separated on a 15 % bis-

155 Tris-gel and immunoblotted using the antiserum raised against EsxA (19), EsxC (19) or the  
156 cytosolic control TrxA (33).



157 **REFERENCES**

- 158 1. **Groschel MI, Sayes F, Simeone R, Majlessi L, Brosch R.** ESX secretion systems:  
159 mycobacterial evolution to counter host immunity. *Nat Rev Microbiol* 2016;14:677-691.
- 160 2. **Ates LS, Houben EN, Bitter W.** Type VII Secretion: A Highly Versatile Secretion System.  
161 *Microbiol Spect* 2016;4(1) doi: 10.1128/microbiolspec.VMBF-0011-2015.
- 162 3. **Renshaw PS, Lightbody KL, Veverka V, Muskett FW, Kelly G et al.** Structure and  
163 function of the complex formed by the tuberculosis virulence factors CFP-10 and ESAT-6.  
164 *EMBO J* 2005;24:2491-2498.
- 165 4. **Sundaramoorthy R, Fyfe PK, Hunter WN.** Structure of *Staphylococcus aureus* EsxA  
166 suggests a contribution to virulence by action as a transport chaperone and/or adaptor protein.  
167 *J Mol Biol* 2008;383:603-614.
- 168 5. **Daleke MH, Ummels R, Bawono P, Heringa J, Vandenbroucke-Grauls CM et al.** General  
169 secretion signal for the mycobacterial type VII secretion pathway. *Proc Natl Acad Sci USA*  
170 2012;109:11342-11327.
- 171 6. **Poulsen C, Panjikar S, Holton SJ, Wilmanns M, Song YH.** WXG100 protein superfamily  
172 consists of three subfamilies and exhibits an alpha-helical C-terminal conserved residue  
173 pattern. *PLoS ONE* 2014;9:e89313.
- 174 7. **Solomonson M, Setiaputra D, Makepeace KA, Lameignere E, Petrotchenko EV et al.**  
175 Structure of EspB from the ESX-1 type VII secretion system and insights into its export  
176 mechanism. *Structure* 2015;23:571-583.
- 177 8. **Sysoeva TA, Zepeda-Rivera MA, Huppert LA, Burton BM.** Dimer recognition and  
178 secretion by the ESX secretion system in *Bacillus subtilis*. *Proc Natl Acad Sci USA*  
179 2014;111:7653-7658.
- 180 9. **Ekiert DC, Cox JS.** Structure of a PE-PPE-EspG complex from *Mycobacterium tuberculosis*  
181 reveals molecular specificity of ESX protein secretion. *Proc Natl Acad Sci USA*  
182 2014;111:14758-14763.

- 183 10. **Korotkova N, Freire D, Phan TH, Ummels R, Creekmore CC et al.** Structure of the  
184 *Mycobacterium tuberculosis* type VII secretion system chaperone EspG5 in complex with  
185 PE25-PPE41 dimer. *Mol Microbiol* 2014;94:367-382.
- 186 11. **Daleke MH, van der Woude AD, Parret AH, Ummels R, de Groot AM et al.** Specific  
187 chaperones for the type VII protein secretion pathway. *J Biol Chem* 2012;287:31939-31947.
- 188 12. **Cao Z, Casabona MG, Kneuper H, Chalmers JD, Palmer T.** The type VII secretion  
189 system of *Staphylococcus aureus* secretes a nuclease toxin that targets competitor bacteria.  
190 *Nat Microbiol* 2016;2:16183.
- 191 13. **Whitney JC, Peterson SB, Kim J, Pazos M, Verster AJ et al.** A broadly distributed toxin  
192 family mediates contact-dependent antagonism between gram-positive bacteria. *eLife* 2017;6.
- 193 14. **Unnikrishnan M, Constantinidou C, Palmer T, Pallen MJ.** The Enigmatic Esx Proteins:  
194 Looking Beyond Mycobacteria. *Trends Microbiol* 2017;25:192-204.
- 195 15. **Ramsdell TL, Huppert LA, Sysoeva TA, Fortune SM, Burton BM.** Linked domain  
196 architectures allow for specialization of function in the FtsK/SpolIIE ATPases of ESX secretion  
197 systems. *J Mol Biol* 2015;427:1119-1132.
- 198 16. **Rosenberg OS, Dovala D, Li X, Connolly L, Bendebury A et al.** Substrates Control  
199 Multimerization and Activation of the Multi-Domain ATPase Motor of Type VII Secretion. *Cell*  
200 2015;161:501-512.
- 201 17. **Beckham KS, Ciccarelli L, Bunduc CM, Mertens HD, Ummels R et al.** Structure of the  
202 mycobacterial ESX-5 type VII secretion system membrane complex by single-particle  
203 analysis. *Nat Microbiol* 2017;2:17047.
- 204 18. **Burts ML, Williams WA, DeBord K, Missiakas DM.** EsxA and EsxB are secreted by an  
205 ESAT-6-like system that is required for the pathogenesis of *Staphylococcus aureus* infections.  
206 *Proc Natl Acad Sci USA* 2005;102:1169-1174.
- 207 19. **Kneuper H, Cao ZP, Twomey KB, Zoltner M, Jager F et al.** Heterogeneity in *ess*  
208 transcriptional organization and variable contribution of the Ess/Type VII protein secretion

- 209 system to virulence across closely related *Staphylococcus aureus* strains. *Mol Microbiol*  
210 2014;93:928-943.
- 211 20. **Mielich-Suss B, Wagner RM, Mietrach N, Hertlein T, Marincola G et al.** Flotillin scaffold  
212 activity contributes to type VII secretion system assembly in *Staphylococcus aureus*. *PLoS*  
213 *pathog* 2017;13:e1006728.
- 214 21. **Baptista C, Barreto HC, Sao-Jose C.** High levels of DegU-P activate an Esat-6-like  
215 secretion system in *Bacillus subtilis*. *PLoS ONE* 2013;8:e67840.
- 216 22. **Huppert LA, Ramsdell TL, Chase MR, Sarracino DA, Fortune SM, Burton BM.** The  
217 ESX system in *Bacillus subtilis* mediates protein secretion. *PLoS ONE* 2014;9:e96267.
- 218 23. **Casabona MG, Buchanan G, Zoltner M, Harkins CP, Holden MTG, Palmer T.**  
219 Functional analysis of the EsaB component of the *Staphylococcus aureus* Type VII secretion  
220 system. *Microbiology* 2017;163:1839-1850.
- 221 24. **Anderson M, Ohr RJ, Aly KA, Nocadello S, Kim HK et al.** EssE Promotes  
222 *Staphylococcus aureus* ESS-Dependent Protein Secretion To Modify Host Immune  
223 Responses during Infection. *J Bacteriol* 2017;199:e00527.
- 224 25. **Warne B, Harkins CP, Harris SR, Vatsiou A, Stanley-Wall N et al.** The Ess/Type VII  
225 secretion system of *Staphylococcus aureus* shows unexpected genetic diversity. *BMC*  
226 *Genomics* 2016;17:222.
- 227 26. **Burts ML, DeDent AC, Missiakas DM.** EsaC substrate for the ESAT-6 secretion pathway  
228 and its role in persistent infections of *Staphylococcus aureus*. *Mol Microbiol* 2008;69:736-746.
- 229 27. **Tanaka Y, Kuroda M, Yasutake Y, Yao M, Tsumoto K et al.** (2007) Crystal structure  
230 analysis reveals a novel forkhead-associated domain of ESAT-6 secretion system C protein  
231 in *Staphylococcus aureus*. *Proteins* 2007;69:659-664.
- 232 28. **Zoltner M, Ng WM, Money JJ, Fyfe PK, Kneuper H et al.** EssC: domain structures inform  
233 on the elusive translocation channel in the Type VII secretion system. *Biochem J*  
234 2016;473:1941-1952.

- 235 29. **Jäger F, Zoltner M, Kneuper H, Hunter WN, Palmer T.** Membrane interactions and self-  
236 association of components of the Ess/Type VII secretion system of *Staphylococcus aureus*.  
237 *FEBS Lett* 2016;590:349-357.
- 238 30. **Helle L, Kull M, Mayer S, Marincola G, Zelder ME et al.** Vectors for improved Tet  
239 repressor-dependent gradual gene induction or silencing in *Staphylococcus aureus*.  
240 *Microbiology* 2011;157:3314-3323.
- 241 31. **Phan TH, Ummels R, Bitter W, Houben EN.** Identification of a substrate domain that  
242 determines system specificity in mycobacterial type VII secretion systems. *Sci Rep*  
243 2017;7:42704.
- 244 32. **Casabona MG, Kneuper H, Alferes de Lima D, Harkins CP, Zoltner M et al.** Haem-iron  
245 plays a key role in the regulation of the Ess/type VII secretion system of *Staphylococcus*  
246 *aureus* RN6390. *Microbiology* 2017;163:1839-1850.
- 247 33. **Miller M, Donat S, Rakette S, Stehle T, Kouwen TR et al.** *Staphylococcal* PknB as the  
248 first prokaryotic representative of the proline-directed kinases. *PLoS ONE* 2010;5:e9057.

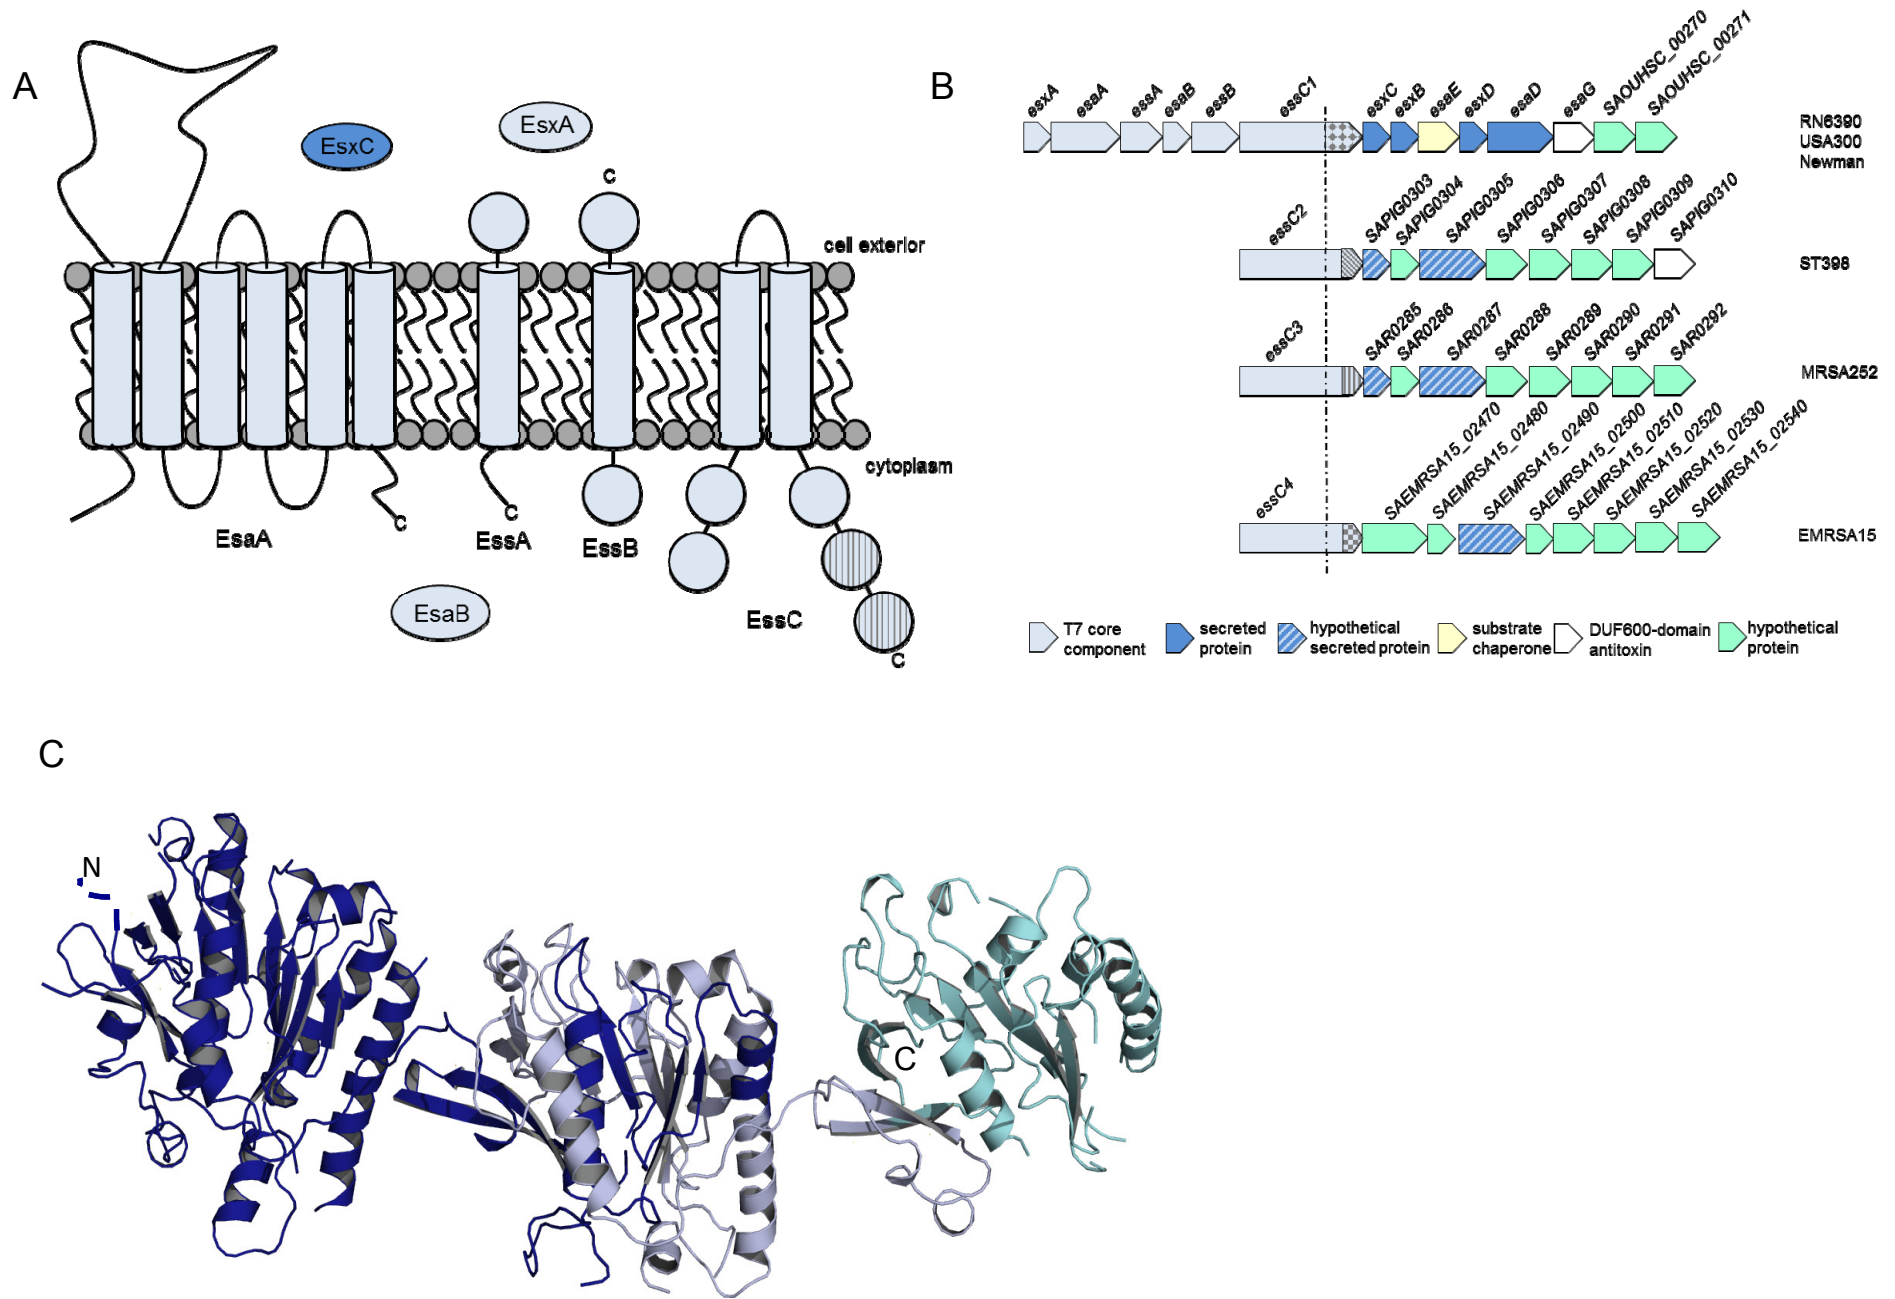

Jäger *et al.* Fig 1

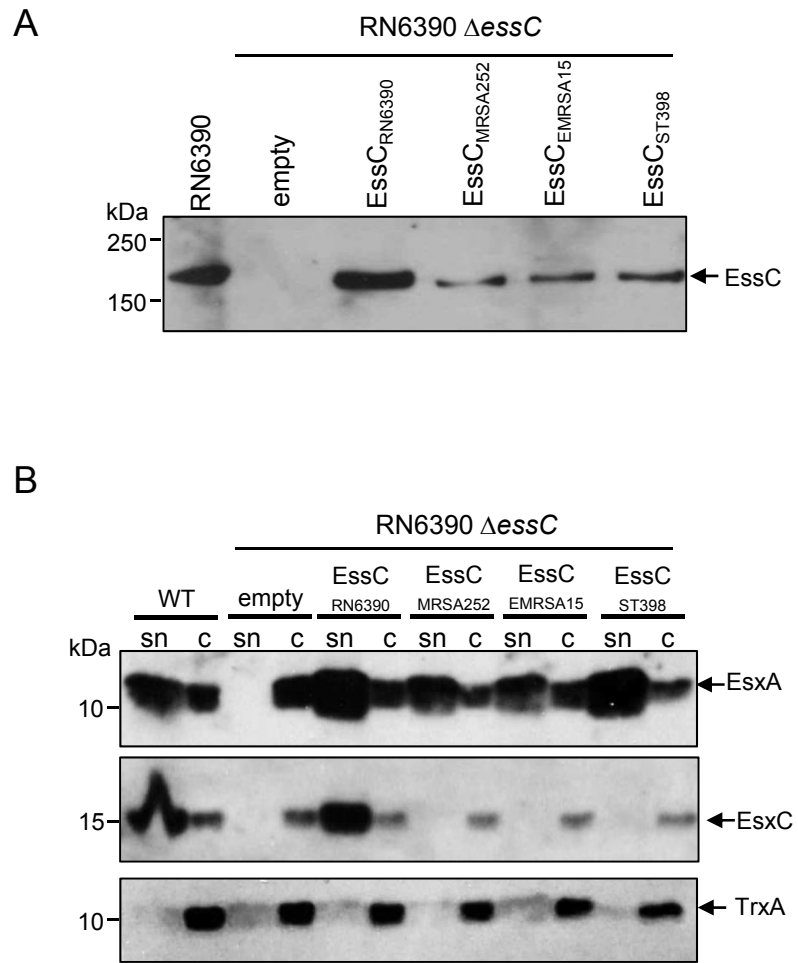

| Name           | Sequence (5' – 3')                 | Restriction site |
|----------------|------------------------------------|------------------|
| essCRN6390fw   | AAATAGATCTAGGACTGAGGCAAG           | <i>Bgl</i> II    |
| essCRN6390rev  | CCTATTGAATTCATTGCTATTAAACC         | <i>Eco</i> RI    |
| essCfwdSacl    | AAAGAGCTCTAGGACTGAGGCAAAGACAATGC   | <i>Sac</i> I     |
| essCr2EMRSA15  | CAAATCTCATAGAGCTCTCGTTTTATTCAAATAA | <i>Sac</i> I     |
| essCr2ST398    | CATAATTGAGCTCCCTATTGAATTAATTTATTTT | <i>Sac</i> I     |
| essCrevMRSA252 | CTTTATGAGCTCTATCCCTCCATTAG         | <i>Sac</i> I     |

**Table S1.** Oligonucleotides used in this study. The *essC* gene from RN6390 was amplified using oligonucleotides *essCRN6390fw* and *essCRN6390rev* and cloned into plasmid pRAB11 as a *Bgl*II-*Eco*RI fragment. The other three *essC* genes were amplified using the same forward primer (*essCfwdSacl*) and a strain-specific reverse primer and cloned into pRAB11 as *Sac*I fragments. All inserts were confirmed for directionality and fidelity by DNA sequencing.

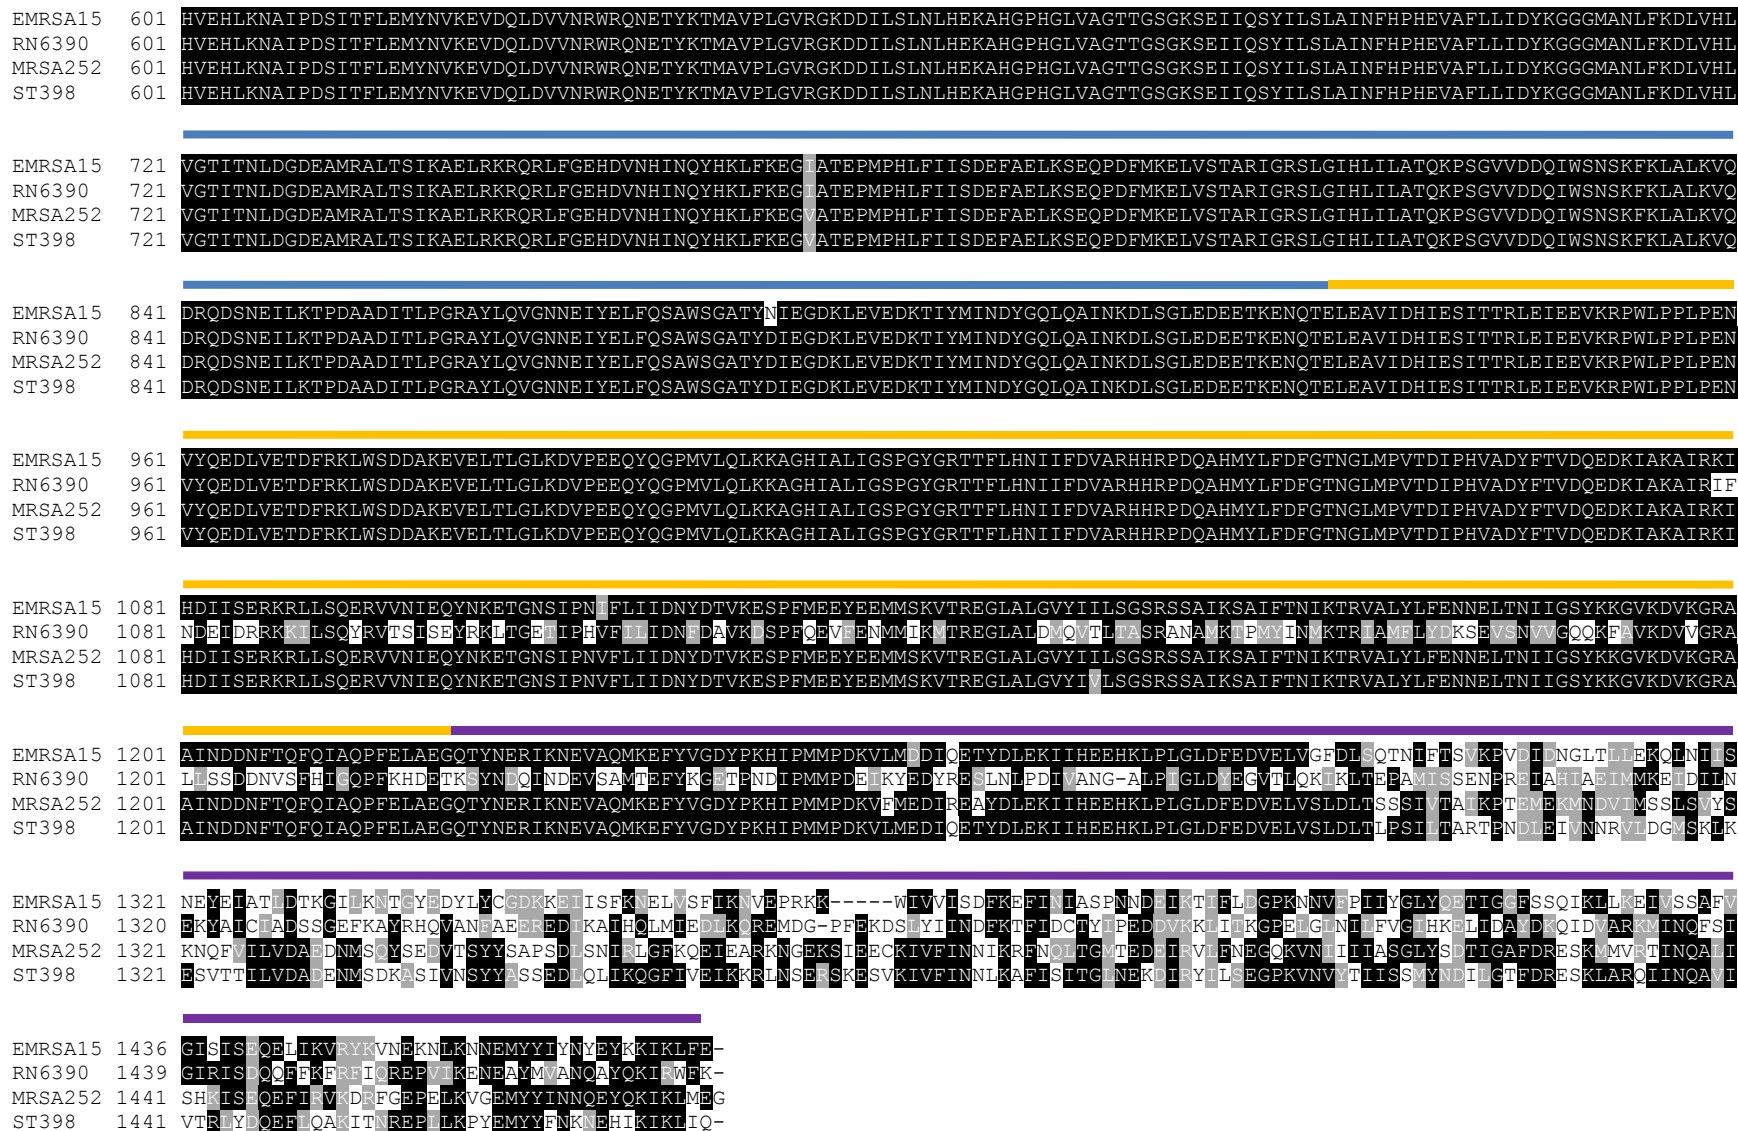

**Figure S1.** Alignment of EssC sequences from the indicated *S. aureus* strains. The alignment was generated using Clustal W (<http://www.ch.embnet.org/software/ClustalW.html>) and shaded using Boxshade ([https://embnet.vital-it.ch/software/BOX\\_form.html](https://embnet.vital-it.ch/software/BOX_form.html)) and is shown from amino acid 600 onwards. The blue, yellow and purple lines above the alignment delimits the extend of ATPase domains 1,2 and 3, respectively.
